# Supplementary material
Source: HighWire-hosted journal article supplement (https://cmaj.ca/highwire/filestream/58321/field_highwire_adjunct_files/4/nursing-hu-5-at.pdf)
Supplement: nursing-hu-5-at.pdf [file nursing-hu-5-at.pdf]

## Appendix 5 (as submitted by the authors)

### *All Cause Mortality*

As can be seen from Table 1 below, 50% of the deaths in our study population are attributed to “diseases of the circulatory system”, and 20% are being attributed to “diseases of the respiratory system” (with pneumonia representing 9%). Since many elderly people have some level of underlying cardiovascular disease, this is often the leading diagnosis that will appear on the death certificate, regardless of the specific event that may have precipitated the patient’s death (i.e., there is substantial misclassification). This is why all-cause mortality was selected for inclusion in the manuscript, rather than cause-specific mortality outcomes.

**Table 1 Cause of death in overall population**

| Cause-of-death                                                                          | Number | Proportion   |
|-----------------------------------------------------------------------------------------|--------|--------------|
| Certain infectious and parasitic diseases                                               | 12     | 1.2%         |
| Endocrine, nutritional and metabolic diseases, and immunity disorders                   | 42     | 4.1%         |
| Diseases of the blood and blood-forming organs                                          | 5      | 0.5%         |
| Mental and behavioral disorders                                                         | 58     | 5.6%         |
| Diseases of the nervous system and sense organs                                         | 58     | 5.6%         |
| Diseases of the circulatory system                                                      | 518    | <b>50.2%</b> |
| Diseases of the respiratory system                                                      | 198    | <b>19.2%</b> |
| Diseases of the digestive system                                                        | 39     | 3.8%         |
| Diseases of the genitourinary system                                                    | 52     | 5.0%         |
| Diseases of the skin and subcutaneous tissue                                            | 2      | 0.2%         |
| Diseases of the musculoskeletal system and connective tissue                            | 11     | 1.1%         |
| Symptoms, signs and abnormal clinical and laboratory findings, not elsewhere classified | 7      | 0.7%         |
| External causes of morbidity and mortality                                              | 28     | 2.7%         |
| Total                                                                                   | 1,031  | 100%         |
